# Supplementary material for: Formation of Nanofoam carbon and re-emergence of Superconductivity in compressed CaC6
Source: PubMed Central journal article supplement (PMC3840379; doi:10.1038/srep03331), 2013-11-26
Supplement: srep03331-s1.pdf [file srep03331-s1.pdf]

***Supplementary information***

**Formation of Nanofoam carbon and re-emergence of  
Superconductivity in compressed CaC<sub>6</sub>**

Yan-Ling Li,<sup>1</sup> Wei Luo,<sup>2</sup> Xiao-Jia Chen,<sup>3,4</sup> Zhi Zeng<sup>4</sup>, Hai-Qing Lin<sup>5</sup> & Rajeev Ahuja<sup>2,6</sup>

<sup>1</sup> School of Physics and Electronic Engineering, Jiangsu Normal University, 221116, Xuzhou, People's Republic of China

<sup>2</sup> Condensed Matter Theory Group, Department of Physics and Astronomy, Uppsala University, P.O. Box 516, SE-751 20 Uppsala, Sweden

<sup>3</sup> Geophysical Laboratory, Carnegie Institution of Washington, Washington, DC 20015, USA

<sup>4</sup> Key Laboratory of Materials Physics, Institute of Solid State Physics, Chinese Academy of Sciences, Hefei 230031, People's Republic of China

<sup>5</sup> Beijing Computational Science Research Center, Beijing 100089, People's Republic of China

<sup>6</sup> Applied Material Physics, Department of Materials Science and Engineering, Royal Institute of Technology (KTH), SE-100 44, Stockholm, Sweden

**This file includes Three Tables and nine Figures.**

**Supplementary Table S1. Structures of stable phases of CaC<sub>6</sub> and carbon foam.**

Only the fractional coordinates of symmetry inequivalent atoms are given. For C222 phase, under pressure, it is easy to transform into *Cmmm* symmetry, which is verified by total enthalpy calculation.

| Pressure<br>(GPa) | Space<br>group<br>(No.)   | Lattice parameters |          |          | Atomic fractional coordinates |         |          |        |  |  |
|-------------------|---------------------------|--------------------|----------|----------|-------------------------------|---------|----------|--------|--|--|
|                   |                           | <i>a</i>           | <i>b</i> | <i>c</i> | $\alpha$                      | $\beta$ | $\gamma$ |        |  |  |
| 0                 | <i>R-3m</i>               | 5.1683             | 5.1683   | 5.1683   | Ca 4 <i>i</i>                 | 0.0000  | 0.0000   | 0.0000 |  |  |
|                   | (164)                     | 49.7               | 49.7     | 49.7     | C1 6 <i>g</i>                 | 0.1667  | 0.8333   | 0.5000 |  |  |
| 19                | <i>C222</i>               | 9.1472             | 3.6947   | 3.5964   | Ca 2 <i>a</i>                 | 0.0000  | 0.0000   | 0.0000 |  |  |
|                   | (29)                      | 90                 | 90       | 90       | C1 4 <i>f</i>                 | 0.4213  | 0.0000   | 0.5000 |  |  |
|                   |                           |                    |          |          | C2 8 <i>l</i>                 | 0.1751  | 0.8082   | 0.4999 |  |  |
| 39                | <i>Pmmn</i>               | 5.8904             | 2.4893   | 6.4903   | Ca 2 <i>b</i>                 | 0.0000  | 0.5000   | 0.7425 |  |  |
|                   | (59)                      | 90                 | 90       | 90       | C1 2 <i>b</i>                 | 0.0000  | 0.5000   | 0.3159 |  |  |
|                   |                           |                    |          |          | C2 2 <i>a</i>                 | 0.0000  | 0.0000   | 0.1766 |  |  |
|                   |                           |                    |          |          | C3 4 <i>f</i>                 | 0.1994  | 0.0000   | 0.0286 |  |  |
|                   |                           |                    |          |          | C4 4 <i>f</i>                 | 0.2791  | 0.0000   | 0.5537 |  |  |
| 126               | <i>Cmcm</i>               | 2.3828             | 16.1113  | 4.0533   | Ca 4 <i>c</i>                 | 0.0000  | 0.4874   | 0.2500 |  |  |
|                   | (63)                      | 90                 | 90       | 90       | C1 8 <i>f</i>                 | 0.0000  | 0.1044   | 0.4303 |  |  |
|                   |                           |                    |          |          | C2 8 <i>f</i>                 | 0.0000  | 0.2705   | 0.5647 |  |  |
|                   |                           |                    |          |          | C3 8 <i>f</i>                 | 0.0000  | 0.3551   | 0.4371 |  |  |
| 0                 | <i>C<sub>6</sub>:Cmcm</i> | 5.9354             | 6.3121   | 2.4675   | C1 4 <i>c</i>                 | 0.0000  | 0.5716   | 0.2500 |  |  |
|                   | (63)                      | 90                 | 90       | 90       | C2 8 <i>g</i>                 | 0.2949  | 0.2163   | 0.2500 |  |  |

**Supplementary Table S2.** The bond lengths and bond angle of carbon nanofoam ( $C_6$ , space group  $Cmcm$ ),  $Pm\bar{m}n$ ,  $Cmcm$  phases of compressed  $CaC_6$  compared to experimental data of graphite and diamond.

| Structure        | Density(g/cm <sup>3</sup> ) | Bond length (Å) |                                   | Bond angle (°)                     |
|------------------|-----------------------------|-----------------|-----------------------------------|------------------------------------|
| Graphite         | 2.27                        | $sp^2-sp^2$     | 1.421                             | $sp^2-sp^2-sp^2$<br>120.00         |
| diamond          | 3.54                        | $sp^3-sp^3$     | 1.545                             | $sp^3-sp^3-sp^3$<br>109.47         |
| 0 GPa            |                             |                 |                                   |                                    |
| nanofoam         | 2.589                       | $sp^2-sp^2$     | 1.410                             | $sp^2-sp^3-sp^2$<br>106.24         |
| $C_6$ ( $Cmcm$ ) |                             | $sp^2-sp^3$     | 1.522                             | $sp^3-sp^3-sp^3$<br>107.55         |
|                  |                             | $sp^3-sp^3$     | 1.529                             | $sp^3-sp^3-sp^2$<br>110.77         |
|                  |                             |                 |                                   | $sp^3-sp^2-sp^2$<br>118.93         |
|                  |                             |                 |                                   | $sp^2-sp^2-sp^2$<br>120.11         |
| $Pm\bar{m}n$     | 3.499                       | $sp^2-sp^2$     | 1.470,1.513                       | $sp^2-sp^3-sp^2$<br>101.70,112.70  |
|                  |                             | $sp^2-sp^3$     | 1.582,1.620                       | $sp^3-sp^3-sp^3$<br>107.43         |
|                  |                             | $sp^3-sp^3$     | 1.596                             | $sp^3-sp^3-sp^2$<br>109.14,111.94  |
|                  |                             |                 |                                   | $sp^3-sp^2-sp^2$<br>117.00,118.73  |
|                  |                             |                 |                                   | $sp^2-sp^2-sp^2$<br>116.46,122.24  |
| 39 GPa           |                             |                 |                                   |                                    |
| $Pm\bar{m}n$     | 3.914                       | $sp^2-sp^2$     | 1.426,1.467                       | $sp^2-sp^3-sp^2$<br>101.59,113.92  |
|                  |                             | $sp^2-sp^3$     | 1.520,1.552                       | $sp^3-sp^3-sp^3$<br>108.02         |
|                  |                             | $sp^3-sp^3$     | 1.538                             | $sp^3-sp^3-sp^2$<br>108.69,111.80  |
|                  |                             |                 |                                   | $sp^3-sp^2-sp^2$<br>117.07,119.01  |
|                  |                             |                 | $sp^2-sp^2-sp^2$<br>116.05,121.50 |                                    |
| 126 GPa          |                             |                 |                                   |                                    |
| $Cmcm$           | 4.788                       | $sp^2-sp^2$     | 1.462                             | $sp^3-sp^2-sp^2$<br>111.58         |
|                  |                             | $sp^2-sp^3$     | 1.461                             | $sp^2-sp^3-sp^3$<br>111.58         |
|                  |                             |                 | 1.458,1.460                       | $sp^3-sp^3-sp^3$<br>107.19, 109.41 |
|                  |                             | $sp^3-sp^3$     | 1.502,1.517                       | $sp^3-sp^3-sp^3$<br>110.78, 111.06 |
|                  |                             |                 |                                   | $sp^2-sp^3-sp^2$<br>109.26         |
|                  |                             |                 | $sp^3-sp^2-sp^3$<br>109.26        |                                    |

<sup>1</sup> Kittel, C. *Introduction to solid state physics* (8th edition, 2004).

**Supplementary Table S3.** The calculated values of the density of states at the Fermi level  $N(0)$ , phonon logarithmic average  $\omega_{\log}$ , electron-phonon interaction  $\lambda$ , and superconducting transition temperature  $T_c$  of  $\text{CaC}_6$  for the  $Pmmn$  structure at different pressures.  $\mu^*$  is the Coulomb pseudopotential parameter.

| <b>Space group</b> | <b><math>P</math><br/>(GPa)</b> | <b><math>N(0)</math><br/>(/Ry)</b> | <b><math>\omega_{\log}</math><br/>(K)</b> | <b><math>\lambda</math></b> | <b><math>T_c</math><br/>(<math>\mu^*=0.11</math>)</b> | <b><math>T_c</math><br/>(<math>\mu^*=0.115</math>)</b> | <b><math>T_c</math><br/>(<math>\mu^*=0.12</math>)</b> |
|--------------------|---------------------------------|------------------------------------|-------------------------------------------|-----------------------------|-------------------------------------------------------|--------------------------------------------------------|-------------------------------------------------------|
| <i>Pmmn</i>        | 39                              | 15.645                             | 642                                       | 0.445                       | 3.87                                                  | 3.48                                                   | 3.12                                                  |
|                    | 51                              | 15.58                              | 663                                       | 0.587                       | 12.7                                                  | 11.9                                                   | 11.2                                                  |
|                    | 78                              | 15.378                             | 623                                       | 0.638                       | 15.4                                                  | 14.7                                                   | 13.9                                                  |
|                    | 117                             | 14.830                             | 728                                       | 0.461                       | 5.23                                                  | 4.74                                                   | 4.28                                                  |

## Figure captions

**Supplementary Fig. S1. Projected density of states of *Pmmn* structure at phase transition pressure.** One can see that there is strong hybridization between Ca-*d* electrons and *p* electrons of C3 and C4 (forming  $sp^2$  hybridized zigzag chains along y-axis direction).  $sp^3$  hybridized C1 and C2 have very little contribution to Fermi level because of their saturated chemical bonds (see also Fig. S3).

**Supplementary Fig. S2. Projected density of states of *Cmcm* structure at phase transition pressure.** Weak hybridization between Ca-*d* electrons and C-*p* electrons is observed at Fermi level. Pressure brings about *d* energy level move to valence bands, which does good to decrease the total energy of system so as to compensate pressure-induced energetic increase, making it be favorable one energetically.

**Supplementary Fig. S3. Electronic local functional (ELF) and structural schematic diagram for *Pmmn* and *Cmcm* phases at phase transitional pressure.** Electronic local functional (ELF)<sup>2</sup> for *Pmmn* structure (a), nanofoam schematic diagram constructed by carbon atoms in *Pmmn* phase, centered with Ca ion chains (b) (unit: Å), *Cmcm* structure along (100) direction (c), and ELF for *Cmcm* structure (d) and (e). In (b) and (c), inequivalent carbon atoms depicted using different color balls, and calcium atoms shown using green balls. For *Pmmn* structure at 39 GPa,  $sp^2$  were connected by  $sp^3$  with C-C chemical bonding (length is 1.552 or 1.520 Å). Along y-axis direction, for  $sp^2$  carbons, there are two types of C-C bonding with different lengths in zigzag chain (1.467 and 1.426 Å). While for  $sp^3$  carbons, the bonding length in zigzag chains along y direction is 1.538 Å. For *Cmcm* structure at 126 GPa, the bonding length could be seen in Table S1.

**Supplementary Fig. S4. Phonon dispersion of *Pmmn* phase at zero pressure obtained using Phonopy code.** Obviously, it is stable dynamically.

**Supplementary Fig. S5. Phonon dispersion of *Cmcm* carbon nanoporous (appeared in phase III) at zero pressure obtained using Phonopy code<sup>3</sup>.**

**Supplementary Fig. S6.** At zero GPa, band structure of carbon foam (space group *Cmcm*) obtained by removing Ca atoms of phase III (space group, *Pmmn*). The band gap is about 0.49 eV.

**Supplementary Fig S7.** Four types of nanoform structures of intercalation compounds under compression.  $\text{LiC}_6$ (a),  $\text{CaC}_6$  (b), and  $\text{KC}_8$  (c and d).

**Supplementary Fig S8.** Total density of states (TDOS) for *R-3m* at ambient pressure, *C222*, *Pmmn*, and *Cmcm* phases at phase transition pressure. Obviously, pressure leads to more expanded electronic distribution compared to that of *R-3m*, which leads to lower TDOS in *C222* and *Cmcm*. However, *Pmmn* phase has comparative TDOS with that of *R-3m* phase.

**Supplementary Fig S9.** Phonon spectrum of three high pressure phases for  $\text{CaC}_6$  at cold pressure calculated using Phonopy code. There are soft modes in peculiar direction for *Pmmn* and *Cmcm* phases.

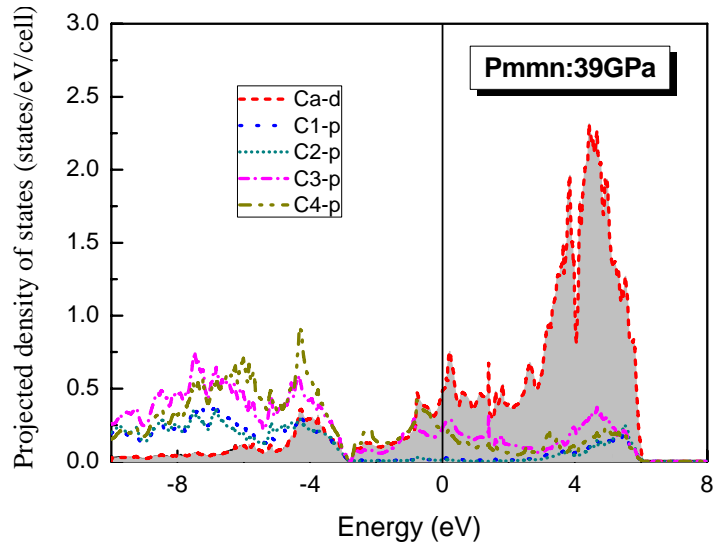

**Supplementary Fig. S1.** Projected density of states of Pmmn structure at phase transition pressure. One can see that there is strong hybridization between Ca-*d* electrons and *p* electrons of C3 and C4 (forming  $sp^2$  hybridized zigzag chains along *y*-axis direction).  $sp^3$  hybridized C1 and C2 have very little contribution to Fermi level because of their saturated chemical bonds (see also Fig. S3).

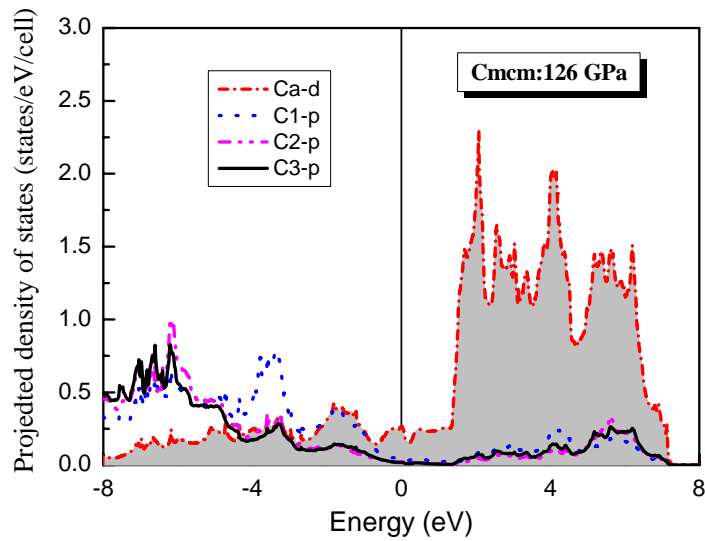

**Supplementary Fig. S2.** Projected density of states of *Cmcm* structure at phase transition pressure. Weak hybridization between Ca-*d* electrons and C-*p* electrons observed at Fermi level. Pressure brings about *d* energy level move to valence bands, which does good to decrease the total energy of system so as to compensate pressure-induced energetic increase, making it be favorable one energetically.

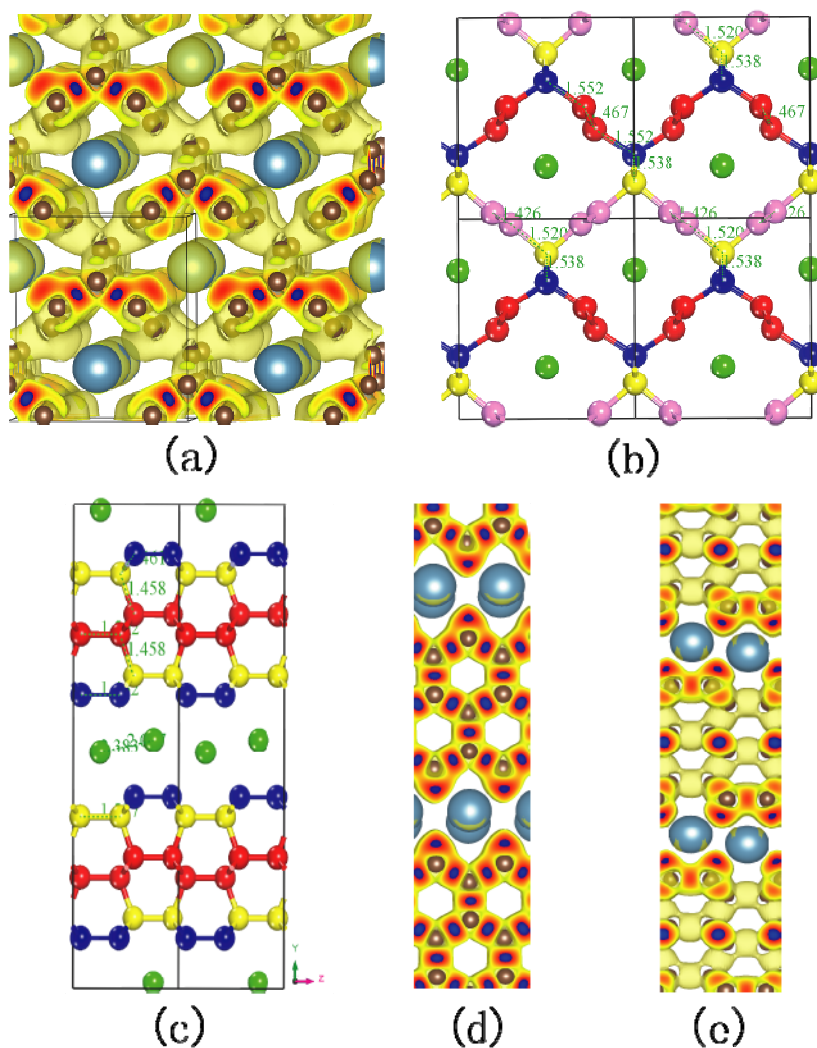

**Supplementary Fig.S3.** Electronic local functional (ELF)<sup>2</sup> for *Pmmn* structure (a), nanofoam schematic diagram constructed by carbon atoms in *Pmmn* phase, centered with Ca ion chains (b) (unit: Å), *Cmcm* structure along (100) direction (c), and ELF for *Cmcm* structure (d) and (e). In (b) and (c), inequivalent carbon atoms depicted using different color balls, and calcium atoms shown using green balls. For *Pmmn* structure at 39 GPa,  $sp^2$  were connected by  $sp^3$  with C-C chemical bonding (length is 1.552 or 1.520 Å). Along y-axis direction, for  $sp^2$  carbons, there are two types of C-C bonding with different lengths in zigzag chain (1.467 and 1.426 Å). While for  $sp^3$  carbons, the bonding length in zigzag chains along y direction is 1.538 Å. For *Cmcm* structure at 126 GPa, the bonding length could be seen in Table S1.



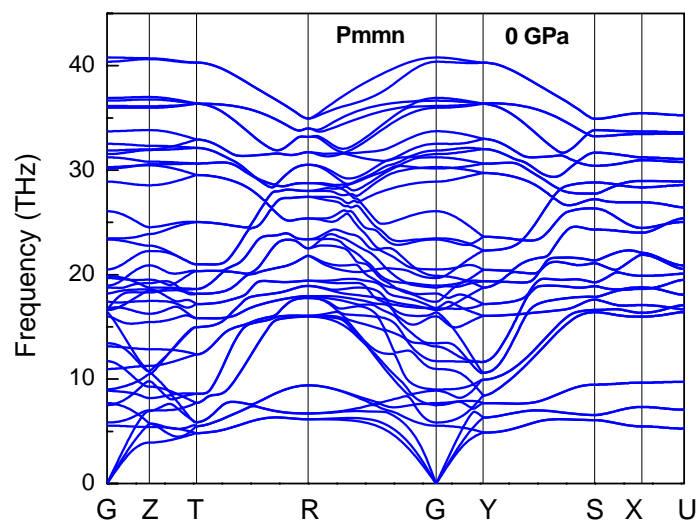

**Supplementary Fig S4.** Phonon dispersion of Pmmn phase at zero pressure obtained using Phonopy code. Obviously, it is stable dynamically.

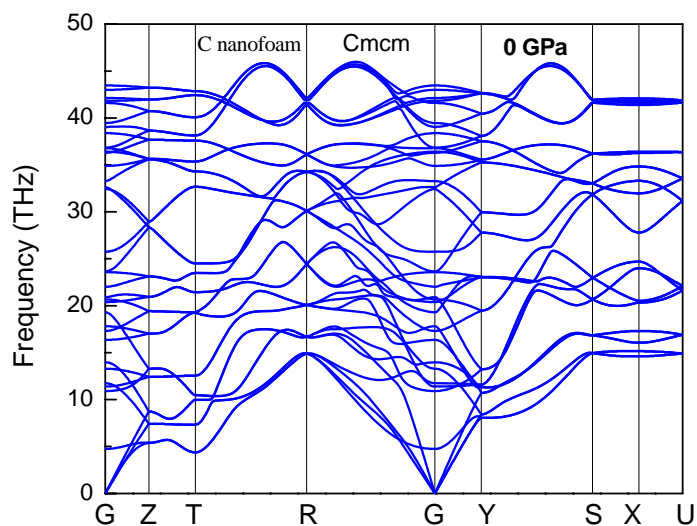

**Supplementary Fig. S5.** Phonon dispersion of Cmcm carbon nanoporous at zero pressure obtained using Phonopy code<sup>3</sup>.

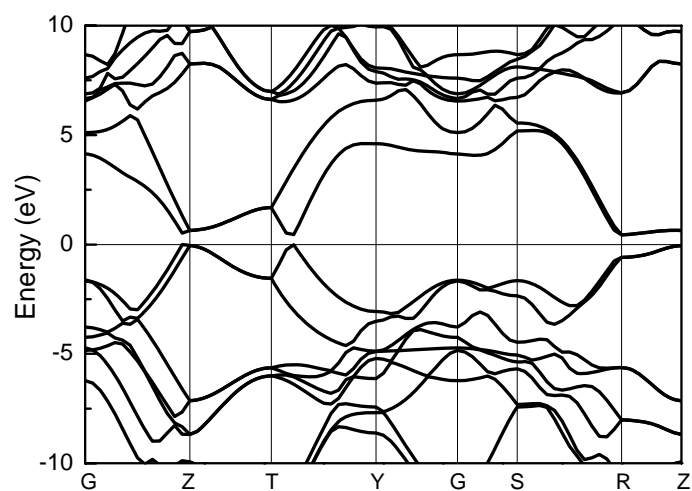

**Supplementary Fig. S6.** At zero GPa, band structure of carbon foam (space group *Cmcm*) obtained by removing Ca atoms of phase III (space group, *Pmmn*). The band gap is about 0.49 eV.

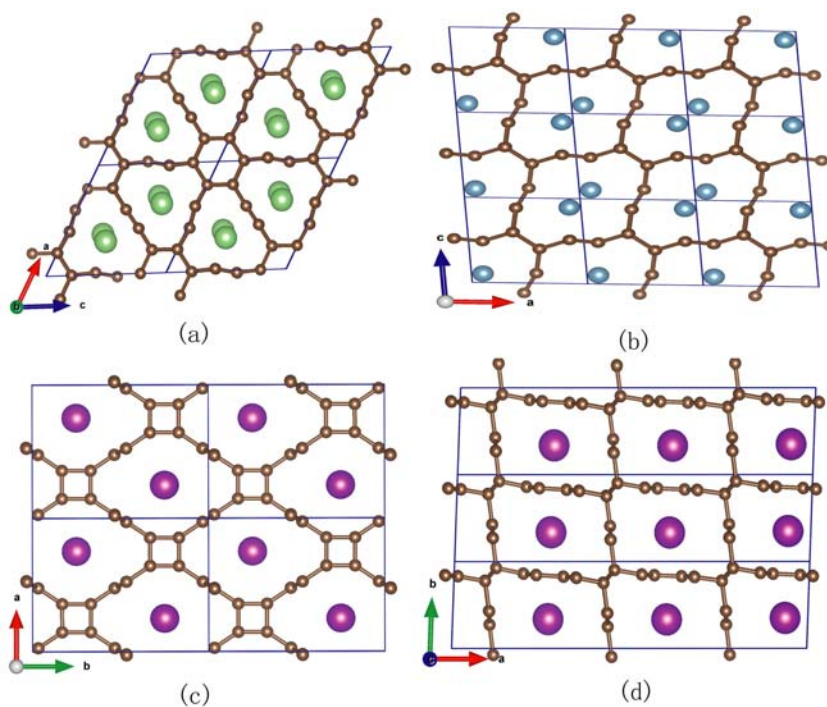

**Supplementary Fig. S7.** Four types of nanoform structures of intercalation compounds under compression.  $\text{LiC}_6$ (a),  $\text{CaC}_6$  (b), and  $\text{KC}_8$  (c and d).

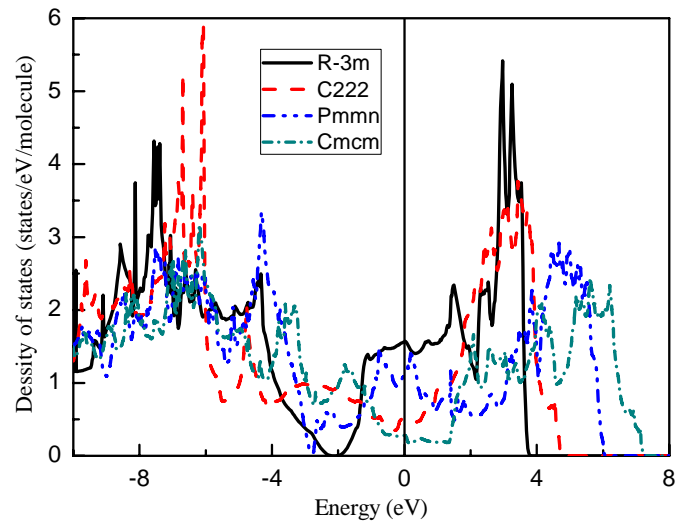

**Supplementary Fig S8.** Total density of states (TDOS) for *R-3m* at ambient pressure, *C222*, *Pmmn*, and *Cmcm* phases at phase transition pressure. Obviously, pressure leads to more expanded electronic distribution compared to that of *R-3m*, which leads to lower TDOS in *C222* and *Cmcm*. However, *Pmmn* phase has comparative TDOS with that of *R-3m* phase.

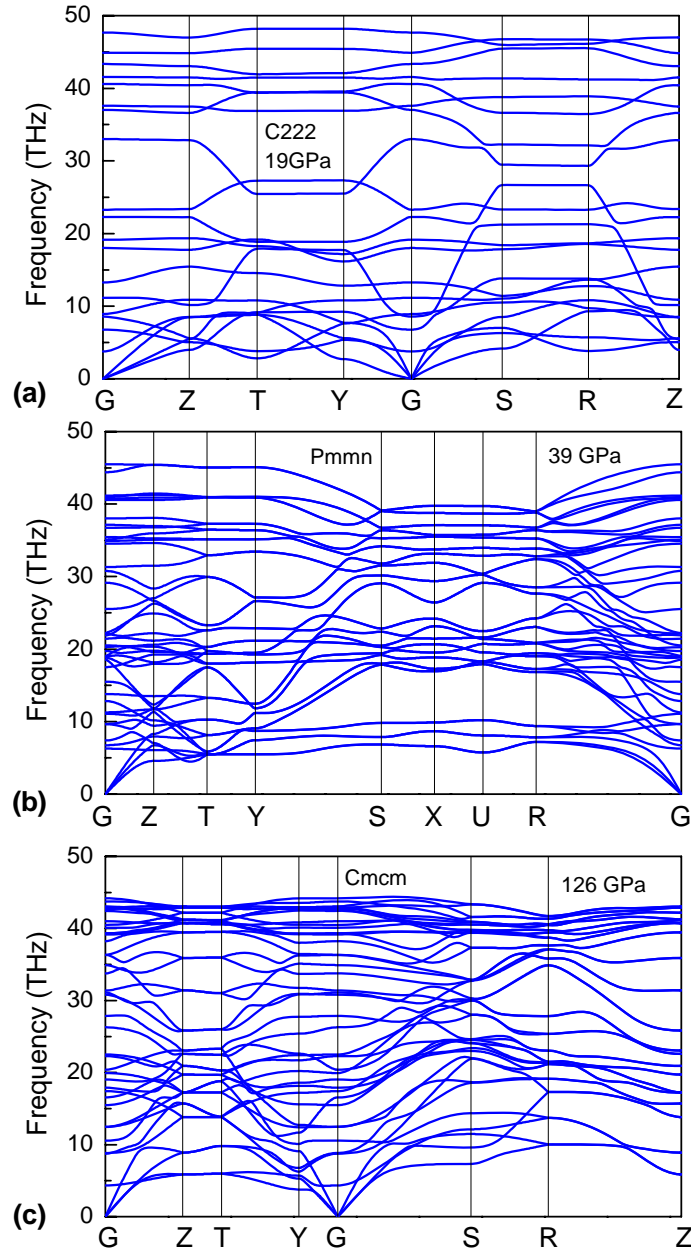

**Supplementary Fig. S9.** Phonon spectrum of three high pressure phases for  $\text{CaC}_6$  at cold pressure calculated using Phonopy code. There are soft modes in peculiar direction for  $Pmmn$  and  $Cmcm$  phases.

### Reference:

1. Kittel C. *Introduction to solid state physics* (8th edition, 2004).
2. Momma K, and Izumi F (2011) VESTA 3 for three-dimensional visualization of crystal, volumetric and morphology data. *J. Appl. Crystallogr.* **44**, 1272-1276.
3. Togo A, Obe F, and Tanaka I (2008) First-principles calculations of the ferroelastic transition between rutile-type and  $\text{CaCl}_2$ -type  $\text{SiO}_2$  at high pressures. *Phys. Rev. B* **78**, 134106.
